# Supplementary material
Source: publisher figshare collection journal article supplement (https://osapublishing.figshare.com/ndownloader/files/26013338)
Supplement: Supplementary file 1 [file 26013338]

## Synchrotron X-ray metrology of dopant distribution and oxidation state in high pressure CVD grown $\text{TM}^{2+}:\text{ZnSe}$ optical fibers: supplement

MICHAEL G. COCO,<sup>1,2,\*</sup>  STEPHEN C. ARO,<sup>1</sup> ALEXANDER HENDRICKSON,<sup>1</sup> JAMES P. KRUG,<sup>1</sup> BARRY LAI,<sup>3</sup> ZHONGHOU CAI,<sup>3</sup> PIER J. SAZIO,<sup>4</sup>  SEAN A. MCDANIEL,<sup>2</sup>  GARY COOK,<sup>2</sup> VENKATRAMAN GOPALAN,<sup>5</sup> AND JOHN V. BADDING<sup>1,5,6,7</sup>

<sup>1</sup>Department of Chemistry, Pennsylvania State University, University Park, PA 16802, USA

<sup>2</sup>Air Force Research Laboratory Sensors Directorate, Wright-Patterson Air Force Base, OH 45433, USA

<sup>3</sup>Advanced Photon Source, Argonne National Laboratory, Lemont, IL 60439, USA

<sup>4</sup>Optoelectronics Research Centre, University of Southampton, Southampton, SO17 1BJ, UK

<sup>5</sup>Department of Materials Science and Engineering, Pennsylvania State University, University Park, PA 16802, USA

<sup>6</sup>Department of Physics, Pennsylvania State University, University Park, PA 16802, USA

<sup>7</sup>Deceased

\*[michael.coco.1.ctr@us.af.mil](mailto:michael.coco.1.ctr@us.af.mil)

This supplement published with The Optical Society on 11 January 2021 by The Authors under the terms of the [Creative Commons Attribution 4.0 License](https://creativecommons.org/licenses/by/4.0/) in the format provided by the authors and unedited. Further distribution of this work must maintain attribution to the author(s) and the published article's title, journal citation, and DOI.

Supplement DOI: <https://doi.org/10.6084/m9.figshare.13342130>

Parent Article DOI: <https://doi.org/10.1364/OME.414201>

# Synchrotron X-Ray Metrology of Dopant Distribution and Oxidation State in High Pressure CVD Grown $\text{TM}^{2+}:\text{ZnSe}$ Optical Fibers: Supplemental Document

This supplemental information contains 4 figures. Figs S1 and S2 X-ray absorption spectra of the standard Fe and Cr compounds. Figs S3 and S4 contain the complete set of XANES spectra collected for the  $\text{Cr}^{2+}:\text{ZnSe}$  and  $\text{Fe}^{2+}:\text{ZnSe}$  optical fibers.

## 1. SUPPLEMENTAL INFORMATION

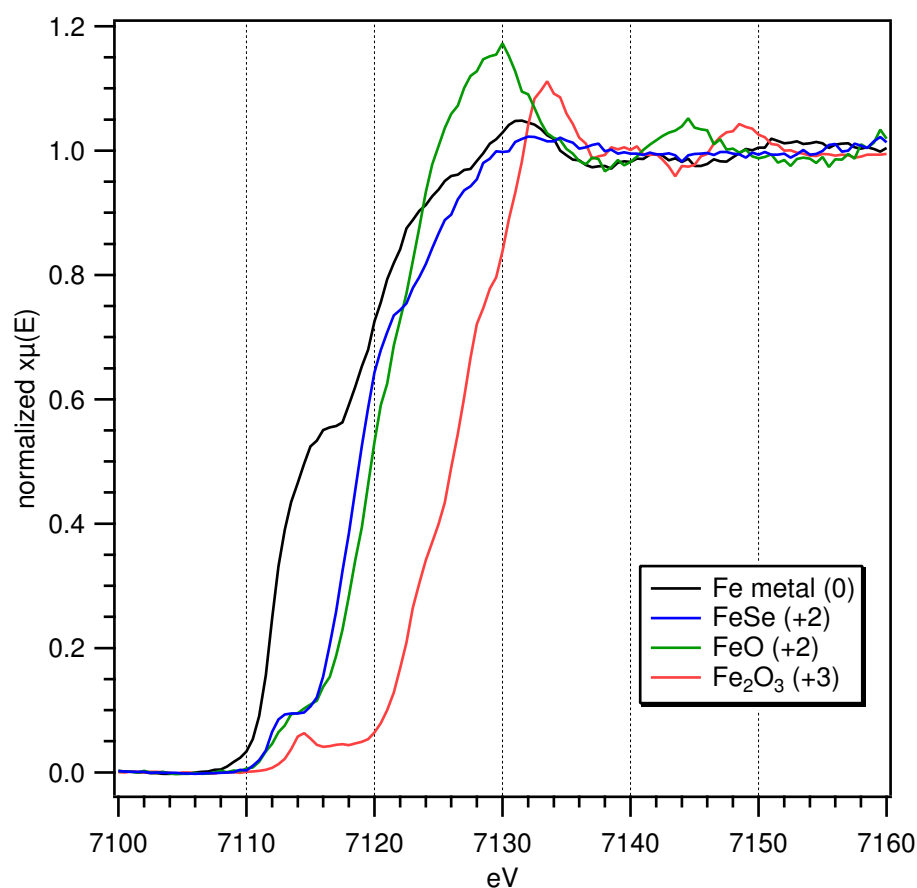

**Fig. S1.** Iron XANES standards and oxidation states: Fe metal (+0), FeSe (+2), FeO(+2), and Fe<sub>2</sub>O<sub>3</sub> (+3).

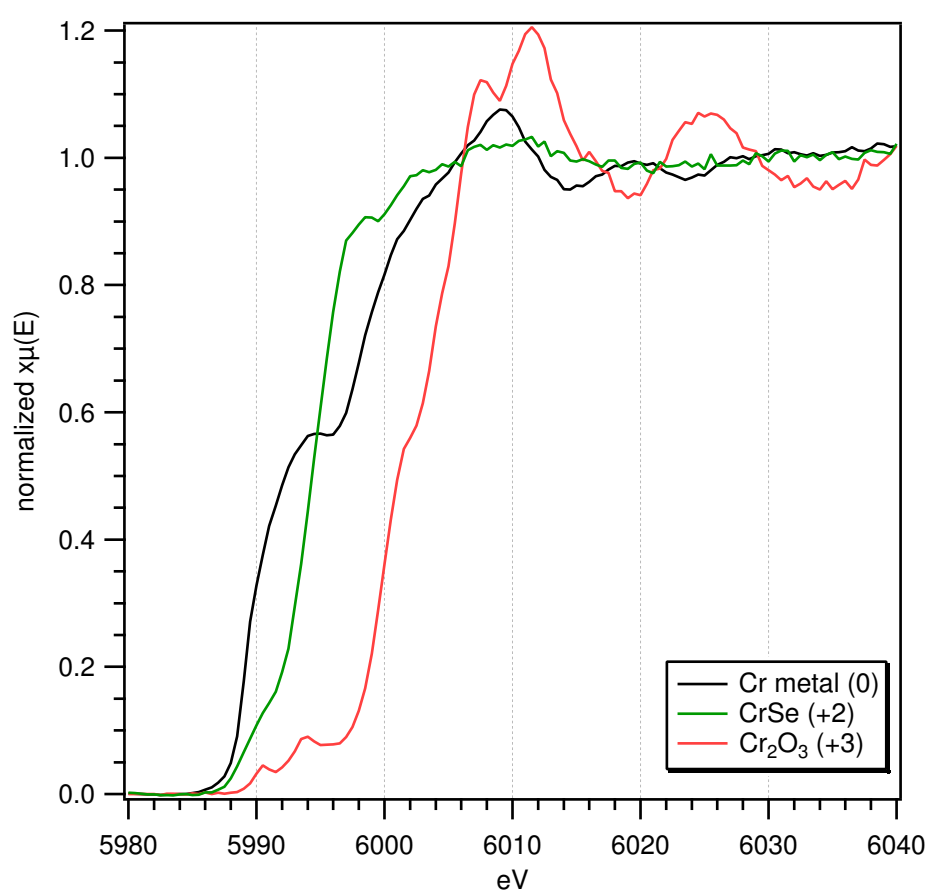

**Fig. S2.** Chromium XANES standards and oxidation states: Cr metal (+0), CrSe (+2), and Cr<sub>2</sub>O<sub>3</sub> (+3).

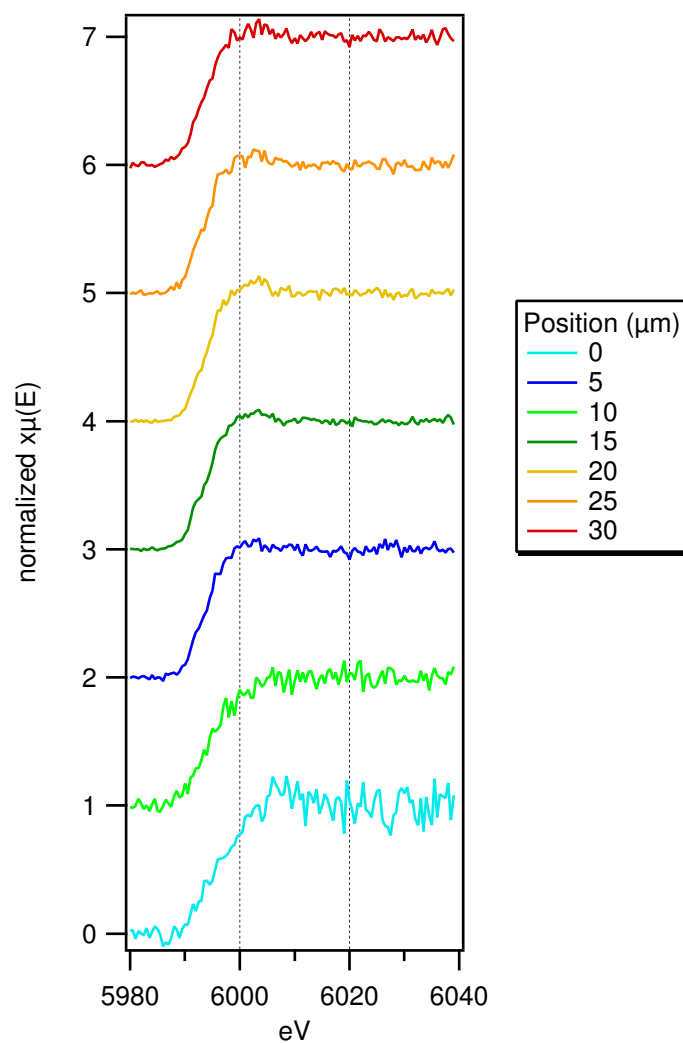

**Fig. S3.** Set of XANES spectra collected from the  $\text{Cr}^{2+}$ :ZnSe optical fiber. Position 0 starts at the outer edge of the sample. Subsequent scans take place at 5  $\mu\text{m}$  intervals moving toward the center of the cross-section. The spectra from the interior of the sample show that the coordination environment for the  $\text{Cr}^{2+}$  is identical. However the spectra collected at positions 0 and 1 indicate sample oxidation at the outer surface, as indicated by the shifted edge energy.

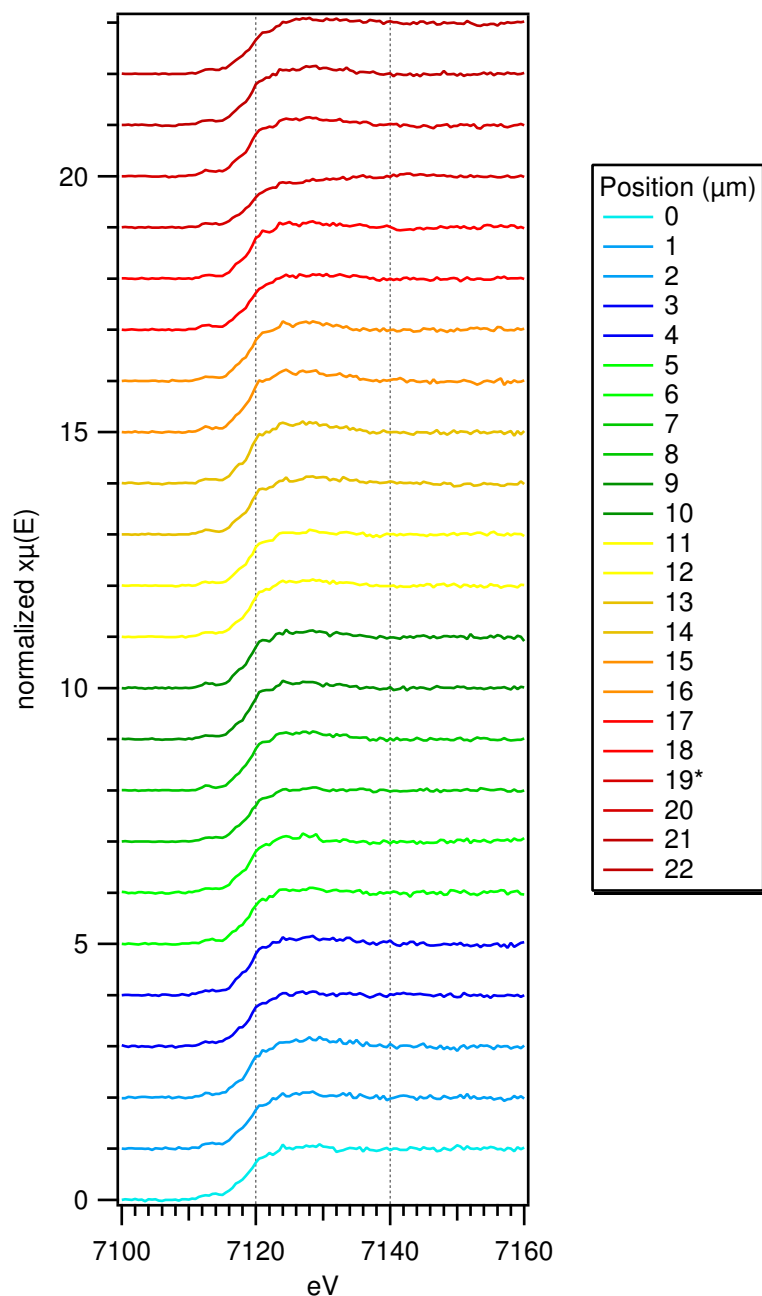

**Fig. S4.** Set of XANES spectra collected from the  $\text{Fe}^{2+}$ :ZnSe optical fiber. Position 0 starts at the outer edge of the sample. Subsequent scans take place at  $1\ \mu\text{m}$  intervals moving toward the center of the cross-section. The spectra from the interior of the sample show that the coordination environment for the  $\text{Fe}^{2+}$  is mostly identical. The spectrum collected at position 19 is more similar to FeSe than  $\text{Fe}^{2+}$ :ZnSe and corresponds to a region that had a locally higher Fe concentration.
